# Supplementary material for: Global Economic Burden Associated with Chronic Kidney Disease: A Pragmatic Review of Medical Costs for the Inside CKD Research Programme
Source: Springer Nature journal article supplement (doi:10.1007/s12325-023-02608-9), 2023-07-26
Supplement: MOESM1 [file 25849608]

## **SUPPLEMENTARY MATERIALS**

**Title:** Global economic burden associated with chronic kidney disease: A pragmatic review of medical costs for the Inside CKD research programme

**Authors:** Vivekanand Jha,<sup>1,2</sup> Saeed M.G. Al-Ghamdi,<sup>3</sup> Guisen Li,<sup>4</sup> Mai-Szu Wu,<sup>5</sup> Panagiotis Stafylas,<sup>6</sup> Lise Retat,<sup>7</sup> Joshua Card-Gowers,<sup>7</sup> Salvatore Barone,<sup>8</sup> Claudia Cabrera,<sup>9</sup> Juan Jose Garcia Sanchez<sup>10</sup>

*(1) School of Public Health, Imperial College, London, United Kingdom, (2) Manipal Academy of Higher Education, Manipal, India, (3) Department of Medicine, College of Medicine, King Abdulaziz University, Jeddah, Saudi Arabia, (4) Sichuan Provincial People's Hospital, Chengdu, China, (5) Division of Nephrology, Taipei Medical University, Taipei, Taiwan, (6) Medical Research & Innovation (HEALTHINK), Thessaloniki, Greece, (7) HealthLumen Limited, London, United Kingdom, (8) Global Medical Affairs AstraZeneca, Gaithersburg, Maryland, United States, (9) Global Medical Affairs, AstraZeneca, Gothenburg, Sweden, (10) Health Economic and Payer Evidence, AstraZeneca, Cambridge, United Kingdom*

**Corresponding author:** Juan Jose Garcia Sanchez

Email: [juanjose.garciasanchez@astrazeneca.com](mailto:juanjose.garciasanchez@astrazeneca.com)

## TABLES

**Table S1. Inside CKD Scientific Steering Committee**

| Country/region                       | Expert                                 | Affiliation                                                                                                                                                                              |
|--------------------------------------|----------------------------------------|------------------------------------------------------------------------------------------------------------------------------------------------------------------------------------------|
| Australia                            | Prof. Steven Chadban                   | Royal Prince Alfred Hospital, Sydney, Australia                                                                                                                                          |
| Belgium                              | Prof. Michel Jadoul                    | Cliniques Universitaires Saint-Luc, Université catholique de Louvain, Brussels, Belgium                                                                                                  |
| Brazil                               | Prof. Marcelo Costa Batista            | Hospital Israelita Albert Einstein, São Paulo, Brazil                                                                                                                                    |
| Canada                               | Dr Navdeep Tangri                      | University of Manitoba, Winnipeg, Canada                                                                                                                                                 |
| China                                | Prof. Guisen Li                        | Sichuan Provincial People's Hospital, Chengdu, China                                                                                                                                     |
| Colombia                             | Prof. José Javier Arango Álvarez       | Universidad del Quindío, Quindío, Colombia                                                                                                                                               |
| Denmark                              | Professor Christian Fynbo Christiansen | Aarhus University Hospital, Denmark                                                                                                                                                      |
| France                               | Prof. Jean-Michel Halimi               | Service de Néphrologie-HTA, Dialyses, Transplantation Rénale, CHU Tours, Tours, France                                                                                                   |
| Germany                              | Prof. Kai-Uwe Eckardt                  | Department of Nephrology and Medical Intensive Care, Charité Universitätsmedizin Berlin, Berlin, Germany                                                                                 |
| Greece                               | Dr. Panagiotis Stafylas                | Medical Research & Innovation (HealThink), Thessaloniki, Greece, and Laboratory of Clinical Pharmacology, School of Medicine, Aristotle University of Thessaloniki, Thessaloniki, Greece |
| Hungary                              | Prof. Istvan Wittmann                  | President of Hungarian Diabetes Society and Hungarian College of nephrologists and Head of the Internal Medicine Department II. at University of Pécs.                                   |
| India                                | Prof. Vivekanand Jha                   | George Institute for Global Health India, New Delhi, India                                                                                                                               |
| Israel                               | Prof. Avraham Karasik                  | Maccabi Institute for Research and Innovation, Tel-Aviv, Israel                                                                                                                          |
| Israel                               | Prof. Gil Chernin                      | Kaplan Medical Center, Faculty of Medicine, Hebrew University of Jerusalem, Jerusalem, Israel                                                                                            |
| Italy                                | Prof. Francesco Saverio Mennini        | CEIS-EEHTA, Faculty of Economics, University of Rome Tor Vergata, Rome, Italy                                                                                                            |
| Italy                                | Prof. Luca De Nicola                   | Department of Advanced Medical and Surgical Sciences, University of Campania Luigi Vanvitelli, Naples, Italy                                                                             |
| Japan                                | Prof. Eiichiro Kanda                   | Kawasaki Medical University, Okayama, Japan                                                                                                                                              |
| Mexico                               | Prof. José Ricardo Correa-Rotter       | Instituto Nacional de Ciencias Médicas y Nutrición Salvador Zubirán Mexico City, Mexico                                                                                                  |
| Netherlands                          | Dr Chris Hagen                         | Meander Medical Centre                                                                                                                                                                   |
| Philippines, Singapore, and Thailand | Assoc. Prof. Jason Choo Chon Jun       | Singapore General Hospital, Singapore                                                                                                                                                    |
| Poland                               | Prof. Michał Nowicki                   | Warsaw University of Technology                                                                                                                                                          |
| Romania                              | Prof. Dr. Ismail Gener                 | Fundeni Institute                                                                                                                                                                        |
| Saudi Arabia                         | Prof. Saeed M. G. Al-Ghamdi            | King Abdulaziz University Hospital and King Faisal Specialist Hospital and Research Centre, Jeddah, Saudi Arabia                                                                         |
| South Korea                          | Prof. Kook-Hwan Oh                     | Seoul National University College of Medicine, Seoul, South Korea                                                                                                                        |
| Spain                                | Prof. Juan Francisco Navarro-González  | Research Unit and Nephrology Service, University Hospital Nuestra Señora de Candelaria, Santa Cruz de Tenerife, Spain                                                                    |
| Sweden                               | Prof. Johan Ärnlöv                     | Department of Neurobiology, Care Sciences and Society, Division of Family Medicine and Primary Care, Karolinska Institute, Stockholm, Sweden                                             |
| Taiwan                               | Prof. Mai-Szu Wu                       | Division of Nephrology, Taipei Medical University, Taipei, Taiwan                                                                                                                        |
| Turkey                               | Prof. Mustafa ARICI                    | Hacettepe University Faculty of Medicine, Department of Nephrology, Ankara, Turkey                                                                                                       |

| <b>Country/region</b>    | <b>Expert</b>       | <b>Affiliation</b>                                       |
|--------------------------|---------------------|----------------------------------------------------------|
| United Arab Emirates     | Prof. Stephen Holt  | SEHA Kidney Care, Abu Dhabi, UAE                         |
| United Kingdom           | Dr Albert Power     | North Bristol NHS Trust, Bristol, UK                     |
| United States of America | Prof. Glenn Chertow | Stanford University School of Medicine, California, USA  |
| United States of America | Prof. Jay Wish      | Indiana University School of Medicine, Indianapolis, USA |

**Table S2. Implied purchasing power parity conversion rates (national currency per international dollar) per country/region<sup>1</sup>**

| Country/region | Currency   | Conversion rates |
|----------------|------------|------------------|
| Australia      | AUS (\$)   | 1.47             |
| Belgium        | EUR (€)    | 0.75             |
| Brazil         | BRL (R\$)  | 2.62             |
| Canada         | CAD (\$)   | 1.25             |
| China          | CNY (¥)    | 4.15             |
| Colombia       | COP (\$)   | 1,374.82         |
| Denmark        | DKK (kr.)  | 6.59             |
| France         | EUR (€)    | 0.73             |
| Germany        | EUR (€)    | 0.73             |
| Greece         | EUR (€)    | 0.51             |
| Hungary        | HUF (Ft)   | 150.40           |
| India          | INR (₹)    | 22.59            |
| Israel         | ILS (₪)    | 3.58             |
| Italy          | EUR (€)    | 0.65             |
| Japan          | JPY (¥)    | 96.14            |
| Mexico         | MXN (\$)   | 9.65             |
| Netherlands    | EUR (€)    | 0.78             |
| Philippines    | PHP (₱)    | 19.33            |
| Poland         | PLN (zł)   | 1.80             |
| Romania        | RON (lei)  | 1.82             |
| Saudi Arabia   | SAR (ر.س.) | 1.76             |
| Singapore      | SGD (S\$)  | 0.81             |
| South Korea    | KRW (₩)    | 819.75           |
| Spain          | EUR (€)    | 0.60             |
| Sweden         | SEK (kr)   | 8.62             |
| Taiwan         | NTD (\$)   | 14.96            |
| Thailand       | THB (฿)    | 11.86            |
| Turkey         | TRY (₺)    | 2.53             |
| UAE            | AED (إ.د.) | 2.12             |
| UK             | GBP (£)    | 0.68             |
| USA            | USD (\$)   | 1.00             |

**Table S3. Annual per patient chronic kidney disease management costs by GFR stage (local currency, 2022 values)**

| Country/region   | Currency   | Stage G3a   |                           | Stage G3b   |                           | Stage G4    |                           | Stage G5    |                            |
|------------------|------------|-------------|---------------------------|-------------|---------------------------|-------------|---------------------------|-------------|----------------------------|
|                  |            | Source year | Inflated cost              |
| Australia        | AUS (\$)   | 2012        | 4,152 <sup>[2]</sup>      | 2012        | 4,152 <sup>[2]</sup>      | 2012        | 17,310 <sup>[2]</sup>     | 2012        | 17,310 <sup>[2]</sup>      |
| Belgium          | EUR (€)    | 2021        | 2,727 <sup>[3]</sup>      | 2021        | 2,814 <sup>[3]</sup>      | 2021        | 4,960 <sup>[3]</sup>      | 2021        | 10,056 <sup>[3]</sup>      |
| Brazil           | BRL (R\$)  | 2021        | 3,296 <sup>[4]</sup>      | 2021        | 3,714 <sup>[4]</sup>      | 2021        | 4,850 <sup>[4]</sup>      | 2021        | 8,019 <sup>[4]</sup>       |
| Canada           | CAD (\$)   | 2017        | 4,600 <sup>[5]</sup>      | 2017        | 6,474 <sup>[5]</sup>      | 2017        | 10,378 <sup>[5]</sup>     | 2017        | 25,650 <sup>[5]</sup>      |
| China            | CNY (¥)    | 2018        | 11,091 <sup>[6]</sup>     | 2018        | 11,091 <sup>[6]</sup>     | 2018        | 31,195 <sup>[6]</sup>     | 2018        | 35,039 <sup>[6]</sup>      |
| Colombia         | COP (\$)   | 2020        | 1,604,090 <sup>[7]</sup>  | 2020        | 1,604,090 <sup>[7]</sup>  | 2020        | 2,195,316 <sup>[7]</sup>  | 2020        | 2,576,458 <sup>[7]</sup>   |
| Denmark          | DKK (kr.)  | 2014        | 8,294 <sup>[4]</sup>      | 2014        | 9,345 <sup>[4]</sup>      | 2014        | 12,204 <sup>[4]</sup>     | 2014        | 20,179 <sup>[4]</sup>      |
| France           | EUR (€)    | 2021        | 2,715 <sup>[3]</sup>      | 2021        | 2,801 <sup>[3]</sup>      | 2021        | 4,937 <sup>[3]</sup>      | 2021        | 10,011 <sup>[3]</sup>      |
| Germany          | EUR (€)    | 2014        | 4,285 <sup>[8]</sup>      | 2014        | 4,285 <sup>[8]</sup>      | 2014        | 4,976 <sup>[8]</sup>      | 2014        | 12,757 <sup>[8]</sup>      |
| Greece           | EUR (€)    | 2021        | 402 <sup>[4]</sup>        | 2021        | 402 <sup>[4]</sup>        | 2021        | 1,262 <sup>[4]</sup>      | 2021        | 2,105 <sup>[4]</sup>       |
| Hungary          | HUF (Ft)   | 2022        | 183,184 <sup>[9]</sup>    | 2022        | 211,511 <sup>[9]</sup>    | 2022        | 233,720 <sup>[9]</sup>    | 2022        | 353,545 <sup>[9]</sup>     |
| India            | INR (₹)    | 2016        | 43,373 <sup>[10]</sup>    | 2016        | 43,373 <sup>[10]</sup>    | 2016        | 39,357 <sup>[10]</sup>    | 2016        | 103,849 <sup>[10]</sup>    |
| Israel           | ILS (₪)    | 2014        | 21,167 <sup>[8]</sup>     | 2014        | 21,167 <sup>[8]</sup>     | 2014        | 24,576 <sup>[8]</sup>     | 2014        | 63,013 <sup>[8]</sup>      |
| Italy            | EUR (€)    | 2012        | 1,553 <sup>[11]</sup>     | 2012        | 2,256 <sup>[11]</sup>     | 2012        | 3,774 <sup>[11]</sup>     | 2012        | 4,632 <sup>[11]</sup>      |
| Japan            | JPY (¥)    | 2018        | 257,119 <sup>[6]</sup>    | 2018        | 257,119 <sup>[6]</sup>    | 2018        | 723,210 <sup>[6]</sup>    | 2018        | 812,331 <sup>[6]</sup>     |
| Mexico           | MXN (\$)   | 2017        | 14,135 <sup>[12]</sup>    | 2017        | 14,135 <sup>[12]</sup>    | 2017        | 15,269 <sup>[12]</sup>    | 2017        | 113,498 <sup>[12]</sup>    |
| Netherlands      | EUR (€)    | 2021        | 976 <sup>[4]</sup>        | 2021        | 1,099 <sup>[4]</sup>      | 2021        | 1,436 <sup>[4]</sup>      | 2021        | 2,374 <sup>[4]</sup>       |
| Philippines      | PHP (₱)    | 2019        | 8,092 <sup>[13]</sup>     | 2019        | 10,348 <sup>[13]</sup>    | 2019        | 16,034 <sup>[13]</sup>    | 2016        | 88,853 <sup>[10]</sup>     |
| Poland           | PLN (zł)   | 2021        | 68 <sup>[14]</sup>        | 2021        | 274 <sup>[14]</sup>       | 2021        | 548 <sup>[14]</sup>       | 2021        | 617 <sup>[14]</sup>        |
| Romania          | RON (lei)  | 2019        | 3,162 <sup>[15]</sup>     | 2019        | 3,651 <sup>[15]</sup>     | 2019        | 4,035 <sup>[15]</sup>     | 2019        | 6,103 <sup>[15]</sup>      |
| Saudi Arabia     | SAR (ر.س.) | 2014        | 10,397 <sup>[8]</sup>     | 2014        | 10,397 <sup>[8]</sup>     | 2014        | 12,072 <sup>[8]</sup>     | 2014        | 30,952 <sup>[8]</sup>      |
| Singapore        | SGD (S\$)  | 2015        | 4,508 <sup>[16]</sup>     | 2015        | 4,638 <sup>[16]</sup>     | 2015        | 5,338 <sup>[16]</sup>     | 2013        | 6,553 <sup>[17]</sup>      |
| South Korea      | KRW (₩)    | 2017        | 1,347,781 <sup>[18]</sup> | 2017        | 1,347,781 <sup>[18]</sup> | 2017        | 2,194,716 <sup>[18]</sup> | 2017        | 8,985,060 <sup>[18]</sup>  |
| Spain            | EUR (€)    | 2005        | 1,225 <sup>[19]</sup>     | 2011        | 3,836 <sup>[20]</sup>     | 2011        | 3,836 <sup>[20]</sup>     | 2011        | 5,000 <sup>[20]</sup>      |
| Sweden           | SEK (kr)   | 2021        | 28,611 <sup>[11,21]</sup> | 2021        | 46,185 <sup>[11,21]</sup> | 2021        | 69,887 <sup>[11,21]</sup> | 2021        | 102,363 <sup>[11,21]</sup> |
| Taiwan           | NTD (\$)   | 2018        | 40,011 <sup>[6]</sup>     | 2018        | 40,011 <sup>[6]</sup>     | 2018        | 112,541 <sup>[6]</sup>    | 2018        | 126,410 <sup>[6]</sup>     |
| Thailand         | THB (฿)    | 2017        | 4,966 <sup>[13]</sup>     | 2017        | 6,350 <sup>[13]</sup>     | 2017        | 9,839 <sup>[13]</sup>     | 2016        | 54,525 <sup>[10]</sup>     |
| Turkey           | TRY (₺)    | 2022        | 4,294 <sup>[a]</sup>      | 2022        | 4,294 <sup>[a]</sup>      | 2022        | 11,731 <sup>[a]</sup>     | 2022        | 13,001 <sup>[a]</sup>      |
| UAE              | AED (د.ا.) | 2012        | 5,062 <sup>[11]</sup>     | 2012        | 7,355 <sup>[11]</sup>     | 2012        | 12,300 <sup>[11]</sup>    | 2012        | 15,099 <sup>[11]</sup>     |
| UK               | GBP (£)    | 2021        | 851 <sup>[4]</sup>        | 2021        | 959 <sup>[4]</sup>        | 2021        | 1,252 <sup>[4]</sup>      | 2021        | 2,071 <sup>[4]</sup>       |
| USA (commercial) | USD (\$)   | 2013        | 13,124 <sup>[22]</sup>    | 2013        | 15,514 <sup>[22]</sup>    | 2013        | 18,270 <sup>[22]</sup>    | 2013        | 18,270 <sup>[22]</sup>     |
| USA (Medicare)   |            | 2013        | 11,908 <sup>[22]</sup>    | 2013        | 13,101 <sup>[22]</sup>    | 2013        | 15,179 <sup>[22]</sup>    | 2013        | 15,179 <sup>[22]</sup>     |

<sup>a</sup>Expert opinion

**Table S4. Annual per patient kidney replacement therapy costs by treatment modality (local currency, 2022 values)**

| Country/region | Currency   | Haemodialysis |                            | Peritoneal dialysis |                            | Kidney transplant (year 1) |                            | Kidney transplant (year 2+) |                            |
|----------------|------------|---------------|----------------------------|---------------------|----------------------------|----------------------------|----------------------------|-----------------------------|----------------------------|
|                |            | Source year   | Inflated cost              | Source year         | Inflated cost              | Source year                | Inflated cost              | Source year                 | Inflated cost              |
| Australia      | AUS (\$)   | 2009          | 103,356 <sup>[23]</sup>    | 2009                | 69,424 <sup>[23]</sup>     | 2009                       | 127,288 <sup>[23]</sup>    | 2004                        | 17,197 <sup>[24]</sup>     |
| Belgium        | EUR (€)    | 2013          | 77,428 <sup>[3]</sup>      | 2021                | 56,444 <sup>[3]</sup>      | 2007                       | 47,186 <sup>[3]</sup>      | 2007                        | 7,717 <sup>[3]</sup>       |
| Brazil         | BRL (R\$)  | 2018          | 39,237 <sup>[25]</sup>     | 2018                | 44,420 <sup>[25]</sup>     | 2013                       | 137,357 <sup>[26]</sup>    | 2013                        | 14,846 <sup>[26]</sup>     |
| Canada         | CAD (\$)   | 2016          | 82,722 <sup>[27]</sup>     | 2016                | 49,802 <sup>[27]</sup>     | 2008                       | 125,593 <sup>[28]</sup>    | 2008                        | 24,028 <sup>[28]</sup>     |
| China          | CNY (¥)    | 2015          | 101,629 <sup>[29]</sup>    | 2015                | 85,463 <sup>[29]</sup>     | 2010                       | 96,709 <sup>[30]</sup>     | 2020                        | 60,683 <sup>[31]</sup>     |
| Colombia       | COP (\$)   | 2020          | 34,635,252 <sup>[7]</sup>  | 2020                | 34,635,252 <sup>[7]</sup>  | 2020                       | 66,084,138 <sup>[32]</sup> | 2017                        | 8,383,442 <sup>[33]</sup>  |
| Denmark        | DKK (kr.)  | 2009          | 446,789 <sup>[34]</sup>    | 2009                | 287,167 <sup>[34]</sup>    | 2014                       | 387,333 <sup>[35]</sup>    | 2014                        | 92,860 <sup>[35]</sup>     |
| France         | EUR (€)    | 2012          | 98,489 <sup>[36]</sup>     | 2012                | 71,637 <sup>[36]</sup>     | 2012                       | 96,114 <sup>[36]</sup>     | 2012                        | 22,394 <sup>[36]</sup>     |
| Germany        | EUR (€)    | 2006          | 70,773 <sup>[37]</sup>     | 2006                | 70,773 <sup>[37]</sup>     | 2006                       | 114,903 <sup>[38]</sup>    | 2006                        | 11,951 <sup>[38]</sup>     |
| Greece         | EUR (€)    | 2017          | 39,034 <sup>[39]</sup>     | 2017                | 51,758 <sup>[39]</sup>     | 2008                       | 32,966 <sup>[40]</sup>     | 2008                        | 5,183 <sup>[40]</sup>      |
| Hungary        | HUF (Ft)   | 2022          | 4,500,000 <sup>[9]</sup>   | 2022                | 3,028,443 <sup>[41]</sup>  | 2022                       | 6,200,000 <sup>[9]</sup>   | 2022                        | 2,812,369 <sup>[42]</sup>  |
| India          | INR (₹)    | 2015          | 117,074 <sup>[43]</sup>    | 2015                | 117,074 <sup>[43]</sup>    | 2011                       | 576,714 <sup>[44]</sup>    | 2009                        | 179,999 <sup>[45]</sup>    |
| Israel         | ILS (₪)    | 2017          | 296,574 <sup>[46]</sup>    | 2017                | 250,716 <sup>[46]</sup>    | 2006                       | 567,540 <sup>[38]</sup>    | 2006                        | 59,031 <sup>[38]</sup>     |
| Italy          | EUR (€)    | 2013          | 35,700 <sup>[47]</sup>     | 2013                | 35,523 <sup>[47]</sup>     | 2011                       | 73,788 <sup>[48]</sup>     | 2011                        | 11,197 <sup>[49]</sup>     |
| Japan          | JPY (¥)    | 2022          | 4,800,000 <sup>[50]</sup>  | 2022                | 3,600,000 <sup>[50]</sup>  | 2010                       | 3,913,242 <sup>[51]</sup>  | 2011                        | 1,000,932 <sup>[52]</sup>  |
| Mexico         | MXN (\$)   | 2017          | 145,686 <sup>[53]</sup>    | 2017                | 119,659 <sup>[53]</sup>    | 2017                       | 484,671 <sup>[54]</sup>    | 2017                        | 58,814 <sup>[54]</sup>     |
| Netherlands    | EUR (€)    | 2014          | 105,862 <sup>[55]</sup>    | 2014                | 97,223 <sup>[55]</sup>     | 2014                       | 97,563 <sup>[55]</sup>     | 2014                        | 21,997 <sup>[55]</sup>     |
| Philippines    | PHP (₱)    | 2017          | 454,073 <sup>[56]</sup>    | 2016                | 309,281 <sup>[57]</sup>    | 2020                       | 1,476,151 <sup>[58]</sup>  | 2016                        | 458,195 <sup>[59, b]</sup> |
| Poland         | PLN (zł)   | 2021          | 70,249 <sup>[14]</sup>     | 2021                | 90,068 <sup>[14]</sup>     | 2021                       | 67,297 <sup>[14]</sup>     | 2014                        | 17,311 <sup>[60]</sup>     |
| Romania        | RON (lei)  | 2021          | 95,576 <sup>[15]</sup>     | 2019                | 65,011 <sup>[15]</sup>     | 2019                       | 198,067 <sup>[15]</sup>    | 2019                        | 6,103 <sup>[15, a]</sup>   |
| Saudi Arabia   | SAR (ر.س.) | 2018          | 64,243 <sup>[61]</sup>     | 2018                | 75,620 <sup>[61]</sup>     | 2020                       | 68,187 <sup>[62]</sup>     | 2010                        | 20,715 <sup>[63]</sup>     |
| Singapore      | SGD (S\$)  | 2021          | 31,653 <sup>[b]</sup>      | 2021                | 21,914 <sup>[b]</sup>      | 2022                       | 95,000 <sup>[b]</sup>      | 2021                        | 12,682 <sup>[b]</sup>      |
| South Korea    | KRW (₩)    | 2017          | 38,639,047 <sup>[18]</sup> | 2017                | 28,856,366 <sup>[18]</sup> | 2017                       | 76,931,225 <sup>[18]</sup> | 2017                        | 39,992,979 <sup>[18]</sup> |
| Spain          | EUR (€)    | 2011          | 52,134 <sup>[20]</sup>     | 2011                | 52,134 <sup>[20]</sup>     | 2017                       | 24,119 <sup>[62]</sup>     | 2010                        | 7,066 <sup>[63]</sup>      |
| Sweden         | SEK (kr)   | 2021          | 961,726 <sup>[21]</sup>    | 2021                | 643,873 <sup>[21]</sup>    | 2021                       | 641,207 <sup>[64]</sup>    | 2021                        | 130,807 <sup>[64]</sup>    |
| Taiwan         | NTD (\$)   | 2017          | 403,951 <sup>[65]</sup>    | 2013                | 323,162 <sup>[66]</sup>    | 2019                       | 175,151 <sup>[67]</sup>    | 2018                        | 126,410 <sup>[6]</sup>     |
| Thailand       | THB (฿)    | 2014          | 286,810 <sup>[68]</sup>    | 2020                | 75,381 <sup>[69]</sup>     | 2014                       | 1,013,549 <sup>[70]</sup>  | 2014                        | 468,919 <sup>[70]</sup>    |
| Turkey         | TRY (₺)    | 2021          | 60,556 <sup>[71]</sup>     | 2021                | 149,666 <sup>[71]</sup>    | 2021                       | 79,159 <sup>[71]</sup>     | 2022                        | 21,396 <sup>[b]</sup>      |
| UAE            | AED (د.ا.) | 2022          | 150,000 <sup>[b]</sup>     | 2022                | 120,000 <sup>[b]</sup>     | 2011                       | 240,520 <sup>[48]</sup>    | 2011                        | 36,499 <sup>[49]</sup>     |
| UK             | GBP (£)    | 2018          | 24,689 <sup>[72]</sup>     | 2018                | 29,061 <sup>[72]</sup>     | 2019                       | 28,775 <sup>[73]</sup>     | 2009                        | 6,369 <sup>[45]</sup>      |
| USA            | USD (\$)   | 2017          | 103,072 <sup>[74]</sup>    | 2017                | 87,761 <sup>[74]</sup>     | 2015                       | 120,203 <sup>[75]</sup>    | 2012                        | 49,603 <sup>[76]</sup>     |

<sup>a</sup>Stage 5 proxy; <sup>b</sup>Expert opinion

**Table S5. Annual per patient CKD associated complication costs (local currency, 2022 values)**

| Country/region | Currency   | Myocardial infarction |                             | Heart failure |                           | Stroke      |                            | Acute kidney injury |                            |
|----------------|------------|-----------------------|-----------------------------|---------------|---------------------------|-------------|----------------------------|---------------------|----------------------------|
|                |            | Source year           | Inflated cost               | Source year   | Inflated cost             | Source year | Inflated cost              | Source year         | Inflated cost              |
| Australia      | AUS (\$)   | 2005                  | 31,380 <sup>[77]</sup>      | 2017          | 19,587 <sup>[78]</sup>    | 2020        | 1,914 <sup>[79]</sup>      | 2022                | 11,818 <sup>[80]</sup>     |
| Belgium        | EUR (€)    | 2011                  | 17,636 <sup>[3]</sup>       | 2021          | 13,903 <sup>[3]</sup>     | 2021        | 15,941 <sup>[3]</sup>      | 2021                | 28,191 <sup>[3]</sup>      |
| Brazil         | BRL (R\$)  | 2015                  | 72,672 <sup>[81]</sup>      | 2015          | 7,679 <sup>[81]</sup>     | 2018        | 1,818 <sup>[82]</sup>      | 2018                | 2,540 <sup>[83]</sup>      |
| Canada         | CAD (\$)   | 2013                  | 15,747 <sup>[84]</sup>      | 2014          | 13,007 <sup>[85]</sup>    | 2009        | 13,075 <sup>[86]</sup>     | 2015                | 12,497 <sup>[87]</sup>     |
| China          | CNY (¥)    | 2012                  | 28,774 <sup>[88]</sup>      | 2014          | 33,805 <sup>[89]</sup>    | 2016        | 12,300 <sup>[90]</sup>     | 2013                | 25,965 <sup>[91]</sup>     |
| Colombia       | COP (\$)   | 2016                  | 123,804,225 <sup>[92]</sup> | 2017          | 6,921,038 <sup>[53]</sup> | 2017        | 13,797,320 <sup>[53]</sup> | 2022                | 10,736,798 <sup>[93]</sup> |
| Denmark        | DKK (kr.)  | 2014                  | 144,859 <sup>[94]</sup>     | 2016          | 35,487 <sup>[95]</sup>    | 2009        | 73,575 <sup>[96]</sup>     | 2018                | 33,232 <sup>[97,98]</sup>  |
| France         | EUR (€)    | 2016                  | 8,663 <sup>[99]</sup>       | 2017          | 8,461 <sup>[100]</sup>    | 2007        | 19,620 <sup>[101]</sup>    | 2015                | 17,910 <sup>[102]</sup>    |
| Germany        | EUR (€)    | 2014                  | 15,942 <sup>[94]</sup>      | 2014          | 3,936 <sup>[94]</sup>     | 2014        | 15,012 <sup>[94]</sup>     | 2022                | 2,006 <sup>[103]</sup>     |
| Greece         | EUR (€)    | 2012                  | 5,227 <sup>[104]</sup>      | 2016          | 4,403 <sup>[105]</sup>    | 2012        | 4,370 <sup>[104]</sup>     | 2022                | 1,091 <sup>[106]</sup>     |
| Hungary        | HUF (Ft)   | 2019                  | 344,975 <sup>[15]</sup>     | 2020          | 23,731 <sup>[9]</sup>     | 2017        | 471,665 <sup>[107]</sup>   | 2022                | 363,068 <sup>[108]</sup>   |
| India          | INR (₹)    | 2016                  | 85,355 <sup>[109, a]</sup>  | 2016          | 85,355 <sup>[109]</sup>   | 2011        | 183,290 <sup>[110]</sup>   | 2012                | 45,818 <sup>[111]</sup>    |
| Israel         | ILS (₪)    | 2014                  | 78,740 <sup>[94]</sup>      | 2014          | 19,443 <sup>[94]</sup>    | 2004        | 75,525 <sup>[94]</sup>     | 2022                | 17,905 <sup>[112]</sup>    |
| Italy          | EUR (€)    | 2004                  | 15,567 <sup>[113]</sup>     | 2013          | 13,115 <sup>[114]</sup>   | 2007        | 14,172 <sup>[115]</sup>    | 2022                | 3,784 <sup>[116]</sup>     |
| Japan          | JPY (¥)    | 2014                  | 2,263,397 <sup>[117]</sup>  | 2015          | 871,198 <sup>[118]</sup>  | 2022        | 949,876 <sup>[52]</sup>    | 2022                | 21,045 <sup>[119]</sup>    |
| Mexico         | MXN (\$)   | 2016                  | 868,544 <sup>[92]</sup>     | 2017          | 96,795 <sup>[53]</sup>    | 2017        | 48,554 <sup>[53]</sup>     | 2022                | 10,761 <sup>[120]</sup>    |
| Netherlands    | EUR (€)    | 2020                  | 3,212 <sup>[121]</sup>      | 2014          | 6,910 <sup>[122]</sup>    | 2000        | 3,623 <sup>[123]</sup>     | 2022                | 5,730 <sup>[124]</sup>     |
| Philippines    | PHP (₱)    | 2012                  | 38,490 <sup>[125]</sup>     | 2016          | 87,967 <sup>[109]</sup>   | 2013        | 76,946 <sup>[126]</sup>    | 2022                | 19,300 <sup>[127]</sup>    |
| Poland         | PLN (zł)   | 2012                  | 18,416 <sup>[104]</sup>     | 2016          | 15,513 <sup>[105]</sup>   | 2014        | 15,416 <sup>[60]</sup>     | 2022                | 4,664 <sup>[108]</sup>     |
| Romania        | RON (lei)  | 2019                  | 5,505 <sup>[15]</sup>       | 2019          | 5,401 <sup>[128]</sup>    | 2017        | 5,023 <sup>[107]</sup>     | 2022                | 10,362 <sup>[15]</sup>     |
| Saudi Arabia   | SAR (ر.س.) | 2007                  | 39,705 <sup>[113]</sup>     | 2020          | 20,598 <sup>[129]</sup>   | 2020        | 26,697 <sup>[130]</sup>    | 2019                | 11,062 <sup>[131]</sup>    |
| Singapore      | SGD (S\$)  | 2004                  | 15,021 <sup>[132]</sup>     | 2015          | 7,227 <sup>[129]</sup>    | 2012        | 13,532 <sup>[133]</sup>    | 2021                | 2,793 <sup>[134]</sup>     |
| South Korea    | KRW (₩)    | 2012                  | 12,615,808 <sup>[135]</sup> | 2017          | 314,695 <sup>[136]</sup>  | 2015        | 5,358,435 <sup>[137]</sup> | 2021                | 2,837,170 <sup>[134]</sup> |
| Spain          | EUR (€)    | 2004                  | 12,189 <sup>[113]</sup>     | 2015          | 7,404 <sup>[129]</sup>    | 2012        | 9,200 <sup>[130]</sup>     | 2021                | 4,393 <sup>[138,139]</sup> |
| Sweden         | SEK (kr)   | 2022                  | 49,274 <sup>[140]</sup>     | 2022          | 80,529 <sup>[140]</sup>   | 2022        | 105,696 <sup>[140]</sup>   | 2022                | 39,392 <sup>[141]</sup>    |
| Taiwan         | NTD (\$)   | 2019                  | 15,042 <sup>[142]</sup>     | 2019          | 10,877 <sup>[142]</sup>   | 2019        | 34,564 <sup>[142]</sup>    | 2022                | 4,605 <sup>[143]</sup>     |
| Thailand       | THB (฿)    | 2012                  | 24,843 <sup>[125]</sup>     | 2016          | 44,815 <sup>[109]</sup>   | 2014        | 26,086 <sup>[70]</sup>     | 2017                | 17,866 <sup>[144]</sup>    |
| Turkey         | TRY (₺)    | 2021                  | 3,426 <sup>[b]</sup>        | 2021          | 5,746 <sup>[145]</sup>    | 2022        | 23,751 <sup>[b]</sup>      | 2022                | 3,867 <sup>[106]</sup>     |
| UAE            | AED (د.ا.) | 2004                  | 50,741 <sup>[113]</sup>     | 2013          | 42,748 <sup>[114]</sup>   | 2021        | 10,183 <sup>[146]</sup>    | 2019                | 13,345 <sup>[131]</sup>    |
| UK             | GBP (£)    | 2014                  | 6,027 <sup>[122]</sup>      | 2000          | 3,160 <sup>[147]</sup>    | 2020        | 2,802 <sup>[121]</sup>     | 2009                | 2,494 <sup>[148]</sup>     |
| USA            | USD (\$)   | 2010                  | 13,928 <sup>[149]</sup>     | 2017          | 24,930 <sup>[74]</sup>    | 2010        | 23,295 <sup>[149]</sup>    | 2014                | 8,684 <sup>[150]</sup>     |

<sup>a</sup>Heart failure proxy; <sup>b</sup>Expert opinion

## REFERENCES

1. International Monetary Fund. World Economic Outlook Database. 2022. Available at: <https://www.imf.org/en/Publications/WEO/weo-database/2022/October> [Accessed 01/11/2022].
2. Wyld ML, Lee CM, Zhuo X, et al. Cost to government and society of chronic kidney disease stage 1-5: a national cohort study. *Intern Med J.* 2015;45(7):741-7.
3. IQVIA. Hospital disease database analysis. [Internal analysis - data on file].
4. AstraZeneca. Analysis of Clinical Practice Research Datalink (CPRD) (4/5/2021, from the DAPA-CKD).
5. Manns B, Hemmelgarn B, Tonelli M, et al. The Cost of Care for People With Chronic Kidney Disease. *Can J Kidney Health Dis.* 2019;6:2054358119835521.
6. Okubo R, Kondo M, Hoshi SL, et al. Cost-Effectiveness of Behavior Modification Intervention for Patients With Chronic Kidney Disease in the FROM-J Study. *J Ren Nutr.* 2021;31(5):484-93.
7. Analysis from health centres and information from focus groups (data on file).
8. Gandjour A, Armsen W, Wehmeyer W, et al. Costs of patients with chronic kidney disease in Germany. *PLoS One.* 2020;15(4):e0231375.
9. Analysis of Hungarian NHIFA database (data on file). 2022.
10. Ahlawat R, Tiwari P, D'Cruz S. Direct Cost for Treating Chronic Kidney Disease at an Outpatient Setting of a Tertiary Hospital: Evidence from a Cross-Sectional Study. *Value Health Reg Issues.* 2017;12:36-40.
11. Jommi C, Armeni P, Battista M, et al. The Cost of Patients with Chronic Kidney Failure Before Dialysis: Results from the IRIDE Observational Study. *Pharmacoecon Open.* 2018;2(4):459-67.
12. Villarreal-Ríos E, et al.,. Cost per stage of comprehensive care of type 2 diabetic patients with chronic kidney disease. *Physis: Revista de Saude Coletiva.* 2017;27: 1125-1146.
13. Songsermlosakul S, Permsuwan U, Singhan W. Treatment Costs for Patients with Chronic Kidney Disease Who Received Multidisciplinary Care in a District Hospital in Thailand. *Clinicoecon Outcomes Res.* 2020;12(223-231).
14. AEK Forxiga. Dapagliflozin (Forxiga) in the treatment of chronic kidney disease: Economic Analysis. 2021. Available at: [https://bipold.aotm.gov.pl/assets/files/zlecenia\\_mz/2021/181/AW/181\\_OT.4230.22.2021\\_F orxiga\\_AE.pdf](https://bipold.aotm.gov.pl/assets/files/zlecenia_mz/2021/181/AW/181_OT.4230.22.2021_F orxiga_AE.pdf) [Accessed 01/07/2022].
15. Analysis from national inpatient claims database (data on file).
16. Low S, Lim SC, Zhang X, et al. Medical costs associated with chronic kidney disease progression in an Asian population with type 2 diabetes mellitus. *Nephrology.* 2019;24(5):534-41.
17. Lim CC, Chee ML, Cheng CY, et al. Simplified end stage renal failure risk prediction model for the low-risk general population with chronic kidney disease. *PLoS One.* 2019;14(2):e0212590.
18. Kim SH, Jo MW, Go DS, et al. Economic burden of chronic kidney disease in Korea using national sample cohort. *Journal of Nephrology.* 2017;30:787-93.
19. Pons R, Torregrosa E, Hernández-Jaras J, et al. [Estimation of the cost in the pharmacologic treatment of chronic renal failure]. *Nefrología.* 2006;26(3):358-64.
20. Lorenzo-Sellares V, Pedrosa MI, Santana-Expósito B, et al. Cost analysis and sociocultural profile of kidney patients. Impact of the treatment method. *Nefrología.* 2014;34(4):458-68.
21. Eriksson JK, Neovius M, Jacobson SH, et al. Healthcare costs in chronic kidney disease and renal replacement therapy: a population-based cohort study in Sweden. *BMJ Open.* 2016;6(10):e012062.
22. Golestaneh L, Alvarez PJ, Reaven NL, et al. All-cause costs increase exponentially with increased chronic kidney disease stage. *Am J Manag Care.* 2017;23(10 Suppl):S163-S72.
23. Cass A, White S, Snelling P, et al. The economic impact of end-stage kidney disease in Australia: projections to 2020. 2010. Available at: <https://www.georgeinstitute.org/publications/the->



- economic-impact-of-end-stage-kidney-disease-in-australia-projections-to-2020 [Accessed 01/07/2022].
24. Howard K, White S, Salkeld G, et al. Cost-effectiveness of screening and optimal management for diabetes, hypertension, and chronic kidney disease: a modeled analysis. *Value Health*. 2010;13(2):196-208.
  25. Sesso R, Lugon JR. Global Dialysis Perspective: Brazil. *Kidney360*. 2020;1(3):216-9.
  26. Brand S, Caulliraux H, Araujo C, et al. Uma comparação dos custos do transplante renal em relação às diálises no Brasil. *Cadernos de Saúde Pública*. 2016;32.
  27. Beaudry A, Ferguson TW, Rigatto C, et al. Cost of Dialysis Therapy by Modality in Manitoba. *Clin J Am Soc Nephrol*. 2018;13(8):1179-203.
  28. Barnieh L, Manns BJ, Klarenbach S, et al. A description of the costs of living and standard criteria deceased donor kidney transplantation. *Am J Transplant*. 2011;11(3):478-88.
  29. Wang F, Yang C, Long J, et al. Executive summary for the 2015 Annual Data Report of the China Kidney Disease Network (CK-NET). *Kidney Int*. 2019;95(3):501-5.
  30. Zhao W, Zhang L, Han S, et al. Cost analysis of living donor kidney transplantation in China: a single-center experience. *Ann Transplant*. 2012;17(2):5-10.
  31. Zhang L, Zhao MH, Zuo L, et al. China Kidney Disease Network (CK-NET) 2016 Annual Data Report. *Kidney Int Suppl (2011)*. 2020;10(2):e97-e185.
  32. Sarmiento-Bejarano H, Ramírez C, Carrasquilla-Sotomayor M, et al. Carga económica de la enfermedad renal crónica en Colombia, 2015-2016. *Salud Uninorte*. 2019;35:2019.
  33. Sanchez A, Cruz-Santiago J, Mariño-Rojas Fabiola B, et al. Carga de la enfermedad: insuficiencia renal, diálisis-hemodiálisis y trasplante renal en México. *Costo de la enfermedad. Revista Mexicana de Trasplantes*. 2020;9:15-25.
  34. Olsen J, Bonnevie B, Palmhøj Nielsen C, et al. Economic consequences of an increased number of patients on outgoing dialysis. *Scandinavian journal of urology and nephrology*. 2010;44:452-8.
  35. Jensen CE, Sørensen P, Petersen KD. In Denmark kidney transplantation is more cost-effective than dialysis. *Dan Med J*. 2014;61(3):A4796.
  36. Haute Autorite de Sante (HAS). Évaluation médico-économique des stratégies de prise en charge de l'insuffisance rénale chronique terminale en France. 2012. Available at: [https://www.has-sante.fr/upload/docs/application/pdf/2012-09/argu\\_irct\\_volet\\_greffe\\_vf.pdf](https://www.has-sante.fr/upload/docs/application/pdf/2012-09/argu_irct_volet_greffe_vf.pdf) [Accessed 01/11/2022].
  37. Icks A, Haastert B, Gandjour A, et al. Costs of dialysis--a regional population-based analysis. *Nephrol Dial Transplant*. 2010;25(5):1647-52.
  38. Kleophas W, Reichel H. International study of health care organization and financing: development of renal replacement therapy in Germany. *Int J Health Care Finance Econ*. 2007;7(2-3):185-200.
  39. Koukou MG, Smyrniotis VE, Arkadopoulos NF, et al. PD vs HD in Post-Economic Crisis Greece- Differences in Patient Characteristics and Estimation of Therapy Cost. *Perit Dial Int*. 2017;37(5):568-73.
  40. Kontodimopoulos N, Niakas D. An estimate of lifelong costs and QALYs in renal replacement therapy based on patients' life expectancy. *Health Policy*. 2008;86(1):85-96.
  41. Nemzeti Egészségbiztosítási Alapkezelő (NEAK). Honlapra gyógyító megelozo ellatas adatok 2008-2022. 2022. Available at: [https://neak.gov.hu/pfile/file?path=/letoltheto/altfin\\_dok/altfin\\_virt\\_dok2/publikus\\_adatok\\_gyme/alapdiajak\\_telj\\_adatok/A\\_gyogyito-megelozo\\_ellatasokra\\_vonatkozo\\_kozerdeku\\_adatok&inline=true](https://neak.gov.hu/pfile/file?path=/letoltheto/altfin_dok/altfin_virt_dok2/publikus_adatok_gyme/alapdiajak_telj_adatok/A_gyogyito-megelozo_ellatasokra_vonatkozo_kozerdeku_adatok&inline=true) [Accessed 01/02/2022].
  42. State Audit Office of Hungary. 2012.
  43. Kulkarni MJ, Jamale T, Hase NK, et al. A cross-sectional study of dialysis practice-patterns in patients with chronic kidney disease on maintenance hemodialysis. *Saudi J Kidney Dis Transpl*. 2015;26(5):1050-6.

44. Ramachandran R, Jha V. Kidney transplantation is associated with catastrophic out of pocket expenditure in India. *PLoS One*. 2013;8(7):e67812.
45. NHS Digital. Schedule 2 – The Services. 2017. Available at: <https://www.england.nhs.uk/wp-content/uploads/2017/05/service-spec-adult-kidney-transplant-service.pdf> [Accessed 01/07/2022].
46. Häckl D, Kossack N, Schoenfelder T. [Prevalence, Costs of Medical Treatment and Modalities of Dialysis-dependent Chronic Renal Failure in Germany: Comparison of Dialysis Care of Nursing Home Residents and in Outpatient Units]. *Gesundheitswesen*. 2021;83(10):818-28.
47. Vaccaro CM, Sopranzi F. A comparison between the costs of dialysis treatments in Marche Region, Italy: Macerata and Tolentino hospitals. *Ann Ist Super Sanita*. 2017;53(4):344-9.
48. Roggeri DP, Roggeri A, Zocchetti C, et al. Real-world data on healthcare resource consumption and costs before and after kidney transplantation. *Clin Transplant*. 2019;33(10):e13728.
49. Cavallo MC, Sepe V, Conte F, et al. Cost-effectiveness of kidney transplantation from DCD in Italy. *Transplantation Proceedings*. 2014;46(10):3289-96.
50. All Kidney Association - Japan Kidney Disease Council. Cost of dialysis treatment. 2022. Available at: <https://www.zjk.or.jp/kidney-disease/expense/dialysis/> [Accessed 01/10/2022].
51. Kitazawa T, Matsumoto K, Fujita S, et al. Cost Analysis of Transplantation in Japan, Performed With the Use of the National Database. *Transplant Proc*. 2017;49(1):4-9.
52. Kondo M, Yamagata K, Hoshi SL, et al. Cost-effectiveness of chronic kidney disease mass screening test in Japan. *Clinical and Experimental Nephrology*. 2012;16(2):279-91.
53. Arroyave-Loaiza MG, Siqueff-Jose JA, Amador-Vazquez L, et al. Grupos Relacionados con la Atención Ambulatoria de las Enfermedades Endocrinas, Nutricionales y Metabólicas (EGRAA). [Grupos Relacionados con la Atención Ambulatoria de las Enfermedades Endocrinas, Nutricionales y Metabólicas (EGRAA)]. Instituto Mexicano del Seguro Social; 2019.
54. Sánchez-Cedillo A, et al.,. Burden of disease: kidney failure, dialysis-hemodialysis, and kidney transplantation in Mexico. *Cost of illness. Rev Mex Trasl.* 2020; 9: 15-25.
55. Mohnen SM, van Oosten MJM, Los J, et al. Healthcare costs of patients on different renal replacement modalities - Analysis of Dutch health insurance claims data. *PLoS One*. 2019;14(8):e0220800.
56. Health Philippines Net. Philhealth coverage for hemodialysis. 2017. Available at: <http://www.healthphilippines.net/2014/08/philhealth-coverage-for-hemodialysis/> [Accessed 01/07/2022].
57. PhilHealth Circular. PD First Z Benefits: The Z Benefits for End-Stage Renal Disease Requiring Peritoneal Dialysis (Revision 1). 2016. Available at: [https://www.philhealth.gov.ph/circulars/2016/TS\\_circ2016-021.pdf](https://www.philhealth.gov.ph/circulars/2016/TS_circ2016-021.pdf) [Accessed 03/01/2023].
58. National Kidney and Transplant Institute. Frequently asked questions: How much does a kidney transplant cost? 2020. Available at: <https://nkti.gov.ph/index.php/patients-and-visitors/frequently-asked-questions#how-much-do-kidney-transplant-cost> [Accessed 01/07/2022].
59. Agoot L. Baguio hospital gets DOH nod as kidney transplant center. 2022. Available at: <https://www.pna.gov.ph/articles/1173155> [Accessed 01/01/2023].
60. Hałdaś M, Chudzicka A, Ziobro M, et al. Reaching Therapeutic Goals Impacts on Estimated Cost of Illness for Patients with Type 2 Diabetes in Poland. *Journal of Health Policy & Outcomes Research*. 2015;1:44-55.
61. Digital N. Healthcare costing standards for England. Acute: Costing methods. 2019. Available at: [https://www.england.nhs.uk/wp-content/uploads/2020/08/Acute\\_CMs\\_standards20.pdf](https://www.england.nhs.uk/wp-content/uploads/2020/08/Acute_CMs_standards20.pdf) [Accessed 01/07/2022].
62. Ministerio de Sanidad. Hospital discharge records in the national health system. 2021.
63. Arrieta J, Rodríguez-Carmona A, Remón C, et al. Peritoneal dialysis is the best cost-effective alternative for maintaining dialysis treatment. *Nefrología*. 2011;31(5):505-13.

64. von Zur-Mühlen B, Wintzell V, Levine A, et al. Healthcare Resource Use, Cost, and Sick Leave Following Kidney Transplantation in Sweden: A Population-Based, 5-Year, Retrospective Study of Outcomes: COIN. *Ann Transplant*. 2018;23(852-866).
65. Kao TW, Chang YY, Chen PC, et al. Lifetime costs for peritoneal dialysis and hemodialysis in patients in Taiwan. *Perit Dial Int*. 2013;33(6):671-8.
66. Tang CH, Wu YT, Huang SY, et al. Economic costs of automated and continuous ambulatory peritoneal dialysis in Taiwan: a combined survey and retrospective cohort analysis. *BMJ Open*. 2017;7(3):e015067.
67. Chen HY, Kuo S, Su PF, et al. Health Care Costs Associated With Macrovascular, Microvascular, and Metabolic Complications of Type 2 Diabetes Across Time: Estimates From a Population-Based Cohort of More Than 0.8 Million Individuals With Up to 15 Years of Follow-up. *Diabetes Care*. 2020;43(8):1732-40.
68. Thaweethamcharoen T, Sakulbumrungsil R, Nopmaneejumruslers C, et al. Cost-Utility Analysis of Erythropoietin for Anemia Treatment in Thai End-Stage Renal Disease Patients with Hemodialysis. *Value Health Reg Issues*. 2014;3:44-9.
69. Kanjanabuch TA-O, Takkavatakarn K. Global Dialysis Perspective: Thailand. *Kidney360*. 2020;1(7):671-5.
70. Permsuwan U, Dilokthornsakul P, Saokaew S, et al. Cost-effectiveness of dipeptidyl peptidase-4 inhibitor monotherapy in elderly type 2 diabetes patients in Thailand. *Clinicoecon Outcomes Res*. 2016;8:521-9.
71. Turkish health benefit schedule.
72. NHS Improvement. Healthcare costing standards for England - Acute: Costing methods. 2019. Available at: [https://www.england.nhs.uk/wp-content/uploads/2020/08/Acute\\_CM\\_s\\_standards20.pdf](https://www.england.nhs.uk/wp-content/uploads/2020/08/Acute_CM_s_standards20.pdf) [Accessed 01/07/2022].
73. NHS Improvement. National Schedule of NHS Costs 2018/19. 2021. Available at: <https://www.england.nhs.uk/publication/2018-19-national-cost-collection-data-publication/> [Accessed 01/07/2022].
74. Saran R, Robinson B, Abbott KC, et al. US Renal Data System 2019 Annual Data Report: Epidemiology of Kidney Disease in the United States. *Am J Kidney Dis*. 2020;75(1 Suppl 1):A6-A7.
75. Elbasha E, Greaves W, Roth D, et al. Cost-effectiveness of elbasvir/grazoprevir use in treatment-naive and treatment-experienced patients with hepatitis C virus genotype 1 infection and chronic kidney disease in the United States. *J Viral Hepat*. 2017;24(4):268-79.
76. Axelrod DA, Schnitzler MA, Xiao H, et al. An economic assessment of contemporary kidney transplant practice. *Am J Transplant*. 2018;18(5):1168-76.
77. Ioannides-Demos LL, Makarounas-Kirchmann K, Ashton E, et al. Cost of myocardial infarction to the Australian community: a prospective, multicentre survey. *Clin Drug Investig*. 2010;30(8):533-43.
78. Scuffham PA, Ball J, Horowitz JD, et al. Standard vs. intensified management of heart failure to reduce healthcare costs: results of a multicentre, randomized controlled trial. *Eur Heart J*. 2017;38(30):2340-8.
79. Deloitte Access Economics. Economic impact of stroke in Australia. 2020. Available at: <https://www2.deloitte.com/content/dam/Deloitte/au/Documents/Economics/deloitte-au-dae-economic-impact-stroke-report-061120.pdf> [Accessed 01/07/2022].
80. Independent Hospital Pricing Authority. National Efficient Price Determination 2022–23. 2022.
81. Stevens B, Pezzullo L, Verdian L, et al. The economic burden of hypertension, heart failure, myocardial infarction, and atrial fibrillation in Mexico. *Arch Cardiol Mex*. 2018;88(3):241-4.
82. Oliveira GMM, Brant LCC, Polanczyk CA, et al. Cardiovascular Statistics - Brazil 2020. *Arq Bras Cardiol*. 2020;115(3):308-439.

83. Souza Júnior E, Pires D, Nunes G, et al. Acute kidney failure in Northeast Brazil: morbimortality and public costs. 2019;13.
84. Tran DT, Ohinmaa A, Thanh NX, et al. The Healthcare Cost Burden of Acute Myocardial Infarction in Alberta, Canada. *Pharmacoecon Open*. 2018;2(4):433-42.
85. Zaour N, Barbeau M, Liu N, et al. THE COST OF HOSPITALIZATION AND LENGTH OF STAY FOR CHRONIC HEART FAILURE CASES IN CANADA. *Canadian Journal of Cardiology*. 2015;31:S273.
86. Krueger H, Lindsay P, Cote R, et al. Cost avoidance associated with optimal stroke care in Canada. *Stroke*. 2012;43(8):2198-206.
87. Collister D, Pannu N, Ye F, et al. Health Care Costs Associated with AKI. *Clin J Am Soc Nephrol*. 2017;12(11):1733-43.
88. Liu YM, Ma J, Li C, et al. Analysis of hospitalization medical expenses and influencing factors of patients with myocardial infarction. *Chinese Public Health*. 2013(3):322-4.
89. Huang J, Yin H, Zhang M, et al. Understanding the economic burden of heart failure in China: impact on disease management and resource utilization. *J Med Econ*. 2017;20(5):549-53.
90. Zhu DA-O, Shi XA-O, Nicholas S, et al. Medical Service Utilization and Direct Medical Cost of Stroke in Urban China. *Int J Health Policy Manag*. 2022;11(3):277-86.
91. Yang L, Xing G, Wang L, et al. Acute kidney injury in China: a cross-sectional survey. *Lancet*. 2015;386(10002):1465-71.
92. Baeza-Cruz G, Peniche-Otero G, Alva-Esqueda ME, et al. Análisis de Costo de la Enfermedad, del Tratamiento, las Complicaciones e Intervenciones de la Hipercolesterolemia en México en 2016. *Value Health Reg Issues*. 2018;17:56-63.
93. Sistema Integrado de Información de la Protección Social.
94. Schmid T. Costs of treating cardiovascular events in Germany: a systematic literature review. *Health Econ Rev*. 2015;5(1):27.
95. Bundgaard JS, Mogensen UM, Christensen S, et al. The economic burden of heart failure in Denmark from 1998 to 2016. *Eur J Heart Fail*. 2019;21(12):1526-31.
96. Jennum P, Iversen HK, Ibsen R, et al. Cost of stroke: a controlled national study evaluating societal effects on patients and their partners. *BMC Health Serv Res*. 2015;15:466.
97. Kim K, Thomsen RA-O, Nicolaisen SK, et al. Healthcare resource utilisation and cost associated with elevated potassium levels: a Danish population-based cohort study. *BMJ Open*. 2019;9(4):e026465.
98. Sundhedsdatastyrelsen. DRG-takster. 2018. Available at: <https://sundhedsdatastyrelsen.dk/da/afregning-og-finansiering/takster-drg/takster-2018> [Accessed 01/07/2022].
99. Emery C, Torretón E, Briere JB, et al. Economic burden of coronary artery disease or peripheral artery disease in patients at high risk of ischemic events in the French setting: a claims database analysis. *J Med Econ*. 2020;23(5):513-20.
100. Caisse nationale de l'assurance maladie (CNAM). Améliorer la qualité du système de santé et maîtriser les dépenses. Propositions de l'Assurance maladie pour 2020. 2019. Available at: <https://assurance-maladie.ameli.fr/sites/default/files/rapport-charges-et-produits-2020.pdf> [Accessed 01/07/2022].
101. Chevreur K, Durand-Zaleski I, Gouépo A, et al. Cost of stroke in France. *Eur J Neurol*. 2013;20(7):1094-100.
102. Aubry P, Brillet G, Catella L, et al. Outcomes, risk factors and health burden of contrast-induced acute kidney injury: an observational study of one million hospitalizations with image-guided cardiovascular procedures. *BMC Nephrology*. 2016;17(1):167.
103. NHS Reference Costs.
104. Maniadakis N, Kourlaba G, Cokkinos DV, et al. The economic burden of atherothrombosis in Greece: results from the THESIS study. *Eur J Health Econ*. 2013;14(4):655-65.
105. Stafylas P, Farmakis D, Kourlaba G, et al. The heart failure pandemic: The clinical and economic burden in Greece. *Int J Cardiol*. 2017;227:923-9.

106. Ministry of Health. KEN-DRG Payment.
107. Lorenzovici L, Székely A, Csanádi M, et al. Cost Assessment of Inpatient Care Episodes of Stroke in Romania. *Front Public Health*. 2020;8:605919.
108. Polish NHF Data. Codes 415, L82 Ostra niewydolność nerek [Acute renal failure].
109. Singh A, Chauhan S, Devasia T, et al. Financial burden of heart failure in a developing country: cost analysis from Manipal Heart Failure Registry, India. *Journal of Public Health*. 2021;29(3):585-94.
110. Kwatra G, Kaur P, Toor G, et al. Cost of stroke from a tertiary center in northwest India. *Neurol India*. 2013;61(6):627-32.
111. Silver SA, Long J, Zheng Y, et al. Cost of Acute Kidney Injury in Hospitalized Patients. *Journal of Hospital Medicine*. 2017;12(2):70-6.
112. Ministry of Health. Price list for ambulatory services and hospitalization services. 2022. Available at: <https://www.gov.il/he/Departments/DynamicCollectors/moh-price-list?skip=0> [Accessed 01/07/2022].
113. Taylor MJ, Scuffham PA, McCollam PL, et al. Acute coronary syndromes in Europe: 1-year costs and outcomes. *Curr Med Res Opin*. 2007;23(3):495-503.
114. Maggioni AP, Orso F, Calabria S, et al. The real-world evidence of heart failure: findings from 41 413 patients of the ARNO database. *Eur J Heart Fail*. 2016;18(4):402-10.
115. Fattore G, Torbica A, Susi A, et al. The social and economic burden of stroke survivors in Italy: a prospective, incidence-based, multi-centre cost of illness study. *BMC Neurol*. 2012;14(12):137.
116. Ministeria della Salute. Direzione generale della programmazione sanitaria - Ufficio 6: Rapporto annuale sull'attività di ricovero ospedaliero. 2022. Available at: [https://www.salute.gov.it/imgs/C\\_17\\_pubblicazioni\\_3277\\_allegato.pdf](https://www.salute.gov.it/imgs/C_17_pubblicazioni_3277_allegato.pdf) [Accessed July 2022].
117. Kamae I, Hashimoto Y, Koretsune Y, et al. Cost-effectiveness Analysis of Apixaban against Warfarin for Stroke Prevention in Patients with Nonvalvular Atrial Fibrillation in Japan. *Clin Ther*. 2015;37(12):2837-51.
118. Mizuno A, Iguchi H, Sawada Y, et al. The impact of carperitide usage on the cost of hospitalization and outcome in patients with acute heart failure: High value care vs. low value care campaign in Japan. *Int J Cardiol*. 2017;241:243-8.
119. Yamamoto H, Yoshikawa M, M. Y, et al. Comparative study of CHDF and IHD in patients with acute renal failure. *ICU and CCU*. 2005;29:S251-S2.
120. Diario Oficial de la Federacion. Aprobación de los Costos Unitarios por Nivel de Atención Médica actualizados al año 2022. 2022. Available at: [Accessed 01/07/2022].
121. Luengo-Fernandez R, Violato M, Candio P, et al. Economic burden of stroke across Europe: A population-based cost analysis. *Eur Stroke J*. 2020;5(1):17-25.
122. Danese MD, Gleeson M, Kutikova L, et al. Estimating the economic burden of cardiovascular events in patients receiving lipid-modifying therapy in the UK. *Estimating the economic burden of cardiovascular events in patients receiving lipid-modifying therapy in the UK*. 2016;6(8):e011805.
123. Stewart S, Carrington MJ, Marwick TH, et al. Impact of home versus clinic-based management of chronic heart failure: the WHICH? (Which Heart Failure Intervention Is Most Cost-Effective & Consumer Friendly in Reducing Hospital Care) multicenter, randomized trial. *J Am Coll Cardiol*. 2012;60(14):1239-48.
124. Erasmus MC. List of passers-by prices. Available at: <https://www.erasmusmc.nl/en/patient-care/list-prices> [Accessed 01/07/2022].
125. Azmi S, et al.,. PCV34 Cost and Treatment Duration for Acute Myocardial Infarction in South East Asia. *Value in Health*. 2012;15(4).
126. Navarro JC, Baroque ACn, Lokin JK, et al. The real stroke burden in the Philippines. *Int J Stroke*. 2014;9(5):640- 1.

127. Philippine Health Insurance Corporation. Philhealth case rate search. 2022. Available at: <https://crs.philhealth.gov.ph/> [Accessed 01/02/2023].
128. Lorenzovici L, Bârzan-Székely A, Farkas-Ráduly S, et al. Burden of Chronic Heart Failure in Romania. *Healthcare (Basel)*. 2022;10(1):107.
129. Farré NA-O, Vela E, Clèries M, et al. Real world heart failure epidemiology and outcome: A population-based analysis of 88,195 patients. *PLoS One*. 2017;12(2):e0172745.
130. Alvarez-Sabín J, Quintana M, Masjuan J, et al. Economic impact of patients admitted to stroke units in Spain. *Eur J Health Econ*. 2017;18(449-458).
131. Almalki ZS, Iqbal MS, Alablan FM, et al. Long Term Cost-Effectiveness of a Systolic Blood Pressure Goal of <120 mmHg in Hypertensive Patients Without Diabetes Mellitus. *Value Health Reg Issues*. 2020;21:157-63.
132. Turchetti G, Bellelli S, Amato M, et al. The social cost of chronic kidney disease in Italy. *Eur J Health Econ*. 2016;18(7):847-58.
133. Ng CA-O, Toh MP, Ng J, et al. Direct medical cost of stroke in Singapore. *Int J Stroke*. 2015;10(A100):75-82.
134. Health Insurance Review & Assessment Service. Healthcare bigdata hub. 2015. Available at: <https://opendata.hira.or.kr/home.do> [Accessed 01/07/2022].
135. Seo H, Yoon SJ, Yoon J, et al. Recent trends in economic burden of acute myocardial infarction in South Korea. *PLoS One*. 2015;10(2):e0117446.
136. Lee H, Oh SH, Cho H, et al. Prevalence and socio-economic burden of heart failure in an aging society of South Korea. *BMC Cardiovasc Disord*. 2016;16(1):215.
137. Cha YJ. The Economic Burden of Stroke Based on South Korea's National Health Insurance Claims Database. *International Journal of Health Policy and Management*. 2018;7(10):904-9.
138. Escobar C, Morales C, Capel M, et al. Cost-effectiveness analysis of dapagliflozin for the treatment of type 2 diabetes mellitus in Spain: results of the DECLARE-TIMI 58 study. *Cost-effectiveness analysis of dapagliflozin for the treatment of type 2 diabetes mellitus in Spain: results of the DECLARE-TIMI 58 study*. 2022;22(1):217.
139. Ministerio de Sanidad Consumo y Bienestar Social. Conjunto Mínimo Básico de Datos (CMBD). Registro de Atención Especializada. 2021. Available at: <http://pestadistico.inteligenciadegestion.mssi.es/> [Accessed 01/07/2022].
140. Hallberg SA-O, Gandra SR, Fox KM, et al. Healthcare costs associated with cardiovascular events in patients with hyperlipidemia or prior cardiovascular events: estimates from Swedish population-based register data. *Eur J Health Econ*. 2016;17(5):591-601.
141. Sveriges Kommuner och Regioner. Kostnad per patient, KPP. 2022. Available at: <https://skr.se/skr/halsasjukvard/ekonomiavgifter/kostnadperpatientkpp.1076.html> [Accessed 01/11/2022].
142. Ministry of Health and Welfare. Statistics of chronic diseases in the population over 18 years of age (stratified by diseases). 2013. Available at: <https://dep.mohw.gov.tw/dos/cp-1720-7333-113.html> [Accessed 01/05/2022].
143. Ministry of Health and Welfare. National Health Insurance Medical Statistics.
144. Thai CaseMix Centre. Thai DRGs Version 6.2. 2022. Available at: <https://ww2.chi.or.th/dataupload/DRG/Ref/2560/TDRGVersion6.2V/TDRGVersion6.2V1.pdf> [Accessed 01/08/2022].
145. Aras D, Aydoğdu S, Bozkurt E, et al. Cost of heart failure management in Turkey: results of a Delphi Panel. *Balkan Med J*. 2016;39(4):282-9.
146. Chirikov VV, Walker C, Stephens JM, et al. Evaluating the Cost-Effectiveness of Celecoxib versus Ibuprofen and Naproxen in Patients with Osteoarthritis in United Arab Emirates Based on the PRECISION Trial. *Clinicoecon Outcomes Res*. 2021;13:409-20.
147. Stewart S, Jenkins A, Buchan S, et al. The current cost of heart failure to the National Health Service in the UK. *Eur J Heart Fail*. 2002;4(3):361-71.

148. Kerr M. Chronic kidney disease in England: the human and financial cost. NHS Kidney Care. 2012. Available at: <https://www.england.nhs.uk/improvement-hub/wp-content/uploads/sites/44/2017/11/Chronic-Kidney-Disease-in-England-The-Human-and-Financial-Cost.pdf> [Accessed 01/07/2022].
149. Erickson KF, Japa S, Owens DK, et al. Cost-effectiveness of statins for primary cardiovascular prevention in chronic kidney disease. *J Am Coll Cardiol*. 2013;61(12):1250-8.
150. Zeng X, McMahon GM, Brunelli SM, et al. Incidence, outcomes, and comparisons across definitions of AKI in hospitalized individuals. *Clin J Am Soc Nephrol*. 2013;9(1):12-20.
